# Supplementary material
Source: Springer Nature journal article supplement (https://www.springermedizin.de/resource/supplementary/13002_2014_435_MOESM3_ESM.pdf/9626930)

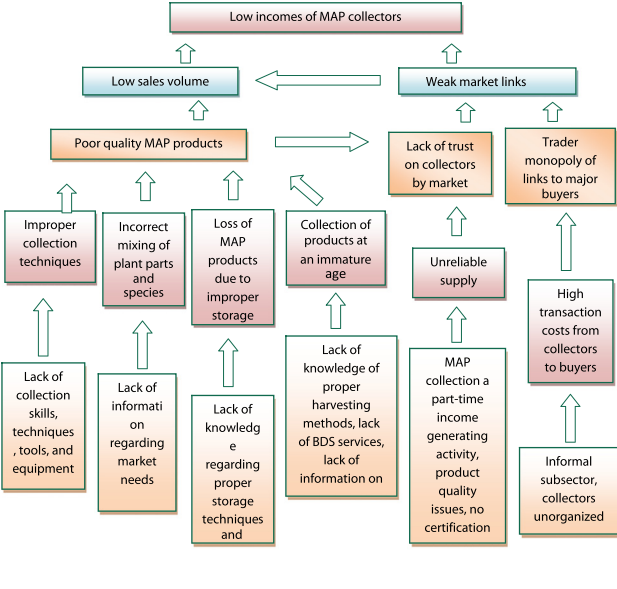

**Root Causes**

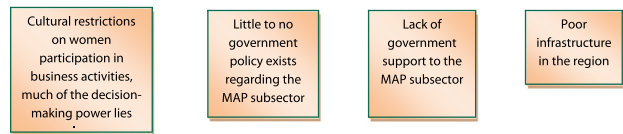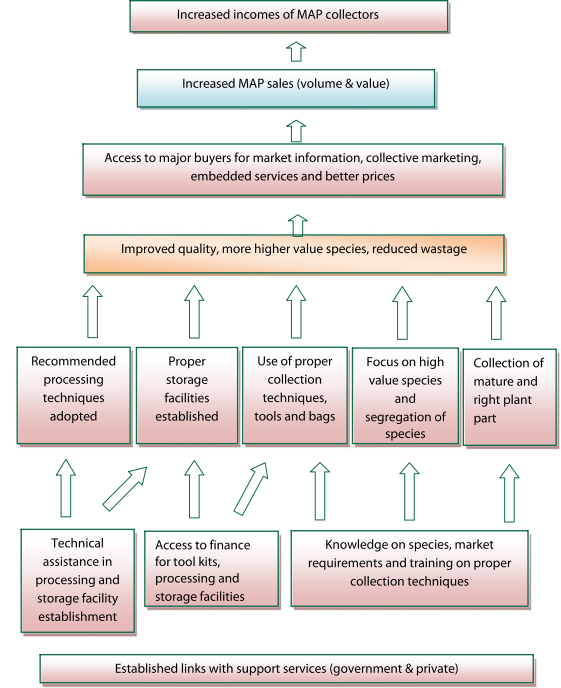

Supplement: MOESM3 [file 9626930]
